# Supplementary material for: Nutritional Characterization of Strychnos madagascariensis Fruit Flour Produced by Mozambican Communities and Evaluation of Its Contribution to Nutrient Adequacy
Source: MDPI journal article supplement (doi:10.3390/foods11040616), 2022-02-21
Supplement: s1 [file s1]

**Table S1.** Limits of detection (LOD) for the elements analyzed by ICP-MS.

| Element | LOD ( $\mu\text{g/g}$ ) |
|---------|-------------------------|
| Al      | 0.928                   |
| As      | 0.127                   |
| Ba      | 0.091                   |
| Be      | 0.011                   |
| Bi      | 0.009                   |
| Cd      | 0.024                   |
| Co      | 0.020                   |
| Cr      | 0.033                   |
| Cs      | 0.012                   |
| Cu      | 0.233                   |
| Li      | 0.013                   |
| Mn      | 0.041                   |
| Ni      | 0.335                   |
| Pb      | 0.018                   |
| Rb      | 0.021                   |
| Se      | 0.181                   |
| Sr      | 0.036                   |
| Tl      | 0.006                   |
| V       | 0.041                   |
| Zn      | 0.529                   |
